# Supplementary material
Source: publisher figshare collection journal article supplement (https://frontiersin.figshare.com/ndownloader/files/25007783)
Supplement: Supplementary file [file 25007783]

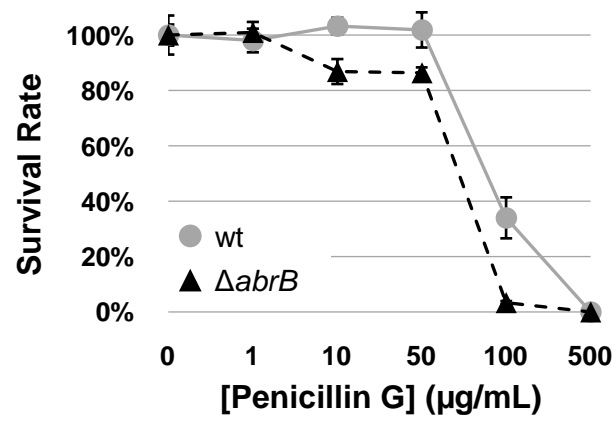

**Figure S6. Penicillin G Survival Assay.**

Survival assay of spores from *S. coelicolor* M145 (wt; grey circles) and mutant  $\Delta abrB$  strains (black triangles) against different concentrations of penicillin G in NMMP plates. Error bars show the standard deviation of quadruplicate assays.
